# Supplementary material for: Development of Nomograms for Predicting Lymph Node Metastasis and Distant Metastasis in Newly Diagnosed T1-2 Non-Small Cell Lung Cancer: A Population-Based Analysis
Source: PubMed Central journal article supplement (PMC8456089; doi:10.3389/fonc.2021.683282), 2021-09-08
Supplement: DataSheet_1.pdf [file DataSheet_1.pdf]

**Comparison of the Descriptors in the Eighth Edition of the TNM Classification of Lung Cancer Compared with the Seventh Edition\***

| <b>Descriptor</b>                                                           | <b>7th Edition T/N/M</b>    | <b>8th Edition T/N/M</b> |
|-----------------------------------------------------------------------------|-----------------------------|--------------------------|
| <b>T component</b>                                                          |                             |                          |
| 0 cm (pure lepidic adenocarcinoma ≤3 cm in total size)                      | T1a if ≤2 cm; T1b if >2-3cm | Tis (AIS)                |
| ≤0.5 cm invasive size (lepidic predominant adenocarcinoma ≤3 cm total size) | T1a if ≤2cm; T1b if >2-3cm  | T1mi                     |
| ≤1cm                                                                        | T1a                         | T1a                      |
| >1-2 cm                                                                     | T1a                         | T1b                      |
| >2-3 cm                                                                     | T1b                         | T1c                      |
| >3-4 cm                                                                     | T2a                         | T2a                      |
| >4-5 cm                                                                     | T2a                         | T2b                      |
| >5-7 cm                                                                     | T2b                         | T3                       |
| >7 cm                                                                       | T3                          | T4                       |
| Bronchus <2 cm from carina                                                  | T3                          | T2                       |
| Total atelectasis/pneumonitis                                               | T3                          | T2                       |
| Invasion of diaphragm                                                       | T3                          | T4                       |
| Invasion of mediastinal pleura                                              | T3                          | —                        |
| <b>N component</b>                                                          |                             |                          |
| No assessment, no involvement, or involvement of regional lymph nodes       | NX, NO, N1, N2, N3          | No change                |
| <b>M component</b>                                                          |                             |                          |
| Metastasis within the thoracic cavity                                       | M1a                         | M1a                      |
| Single extrathoracic metastasis                                             | M1b                         | M1b                      |
| Multiple extrathoracic metastasis                                           | M1b                         | M1c                      |
